# Supplementary material for: Synthesis and evaluation of porous azo-linked polymers for carbon dioxide capture and separation
Source: Royal Society of Chemistry journal article supplement (doi:10.1039/c5ta04308e), 2015-01-01
Supplement: c5ta04308e1.pdf [file c5ta04308e1.pdf]

*Electronic Supplementary Information*

**Synthesis and Evaluation of Porous Azo-Linked Polymers for  
Carbon Dioxide Capture and Separation**

Pezhman Arab, Emily Parrish, Timur Islamoglu, and Hani M. El-Kaderi\*

Department of Chemistry, Virginia Commonwealth University, Richmond, Virginia 23284-  
2006, United States

\*To whom correspondence should be addressed. Email: [helkaderi@vcu.edu](mailto:helkaderi@vcu.edu)

## Contents

|                                                                                       | <i>Page</i>    |
|---------------------------------------------------------------------------------------|----------------|
| <i>Table S1 (optimization of catalyst amount for ALP-7)</i>                           | <b>S3</b>      |
| <i>FT-IR spectroscopy analysis</i>                                                    | <b>S4-S7</b>   |
| <i>Solid state <sup>13</sup>C CP-MAS NMR analysis</i>                                 | <b>S8-S11</b>  |
| <i>Scanning electron microscopy (SEM) imaging</i>                                     | <b>S12-S13</b> |
| <i>Powder X-ray diffraction (XRD) analysis</i>                                        | <b>S14</b>     |
| <i>Thermogravimetric analysis (TGA)</i>                                               | <b>S15</b>     |
| <i>BET plots</i>                                                                      | <b>S16</b>     |
| <i>Langmuir plots</i>                                                                 | <b>S17</b>     |
| <i>Pore size distribution of ALPs</i>                                                 | <b>S18</b>     |
| <i>Low pressure (0 – 1.0 bar) gas uptake isotherms of ALPs at 298 K</i>               | <b>S19</b>     |
| <i>Table S2 (comparison of porosity parameters of ALPs)</i>                           | <b>S20</b>     |
| <i>Table S3 (gas uptakes and <math>Q_{st}</math> of ALPs)</i>                         | <b>S21</b>     |
| <i>Table S4 (comparison of porous azo-linked polymers for CO<sub>2</sub> capture)</i> | <b>S22</b>     |
| <i>Virial fittings</i>                                                                | <b>S23-S24</b> |
| <i>Langmuir-Freundlich fittings for gas isotherms</i>                                 | <b>S25-S28</b> |
| <i>High-pressure (1-10 bar) gas uptake of ALPs at 298 K</i>                           | <b>S29-S30</b> |
| <i>Table S5 (IAST selectivity of different classes of azo-linked porous polymers)</i> | <b>S31</b>     |
| <i>Initial slope selectivity studies of ALPs</i>                                      | <b>S32-S36</b> |

**Table S1.** The effect of amount of catalyst on surface area of ALP-7.<sup>a</sup>

| Entry | CuBr (mg) | Pyridine (mg) | Surface area (m <sup>2</sup> g <sup>-1</sup> ) <sup>b</sup> |
|-------|-----------|---------------|-------------------------------------------------------------|
| 1     | 20        | 80            | 60                                                          |
| 2     | 40        | 160           | 400                                                         |
| 3     | 80        | 320           | 100                                                         |
| 4     | 80        | 160           | 390                                                         |
| 5     | 60        | 160           | 380                                                         |
| 6     | 60        | 120           | 240                                                         |
| 7     | 40        | 120           | 370                                                         |
| 8     | 30        | 80            | 230                                                         |

<sup>a</sup>Reaction conditions: monomer (100 mg), THF (11 ml), toluene (11 ml), stirred at 25 °C for 24 h, at 60 °C for 12 h, and at 80 °C for 12 h. <sup>b</sup>BET surface areas were calculated from N<sub>2</sub> adsorption isotherms collected by NOVA (*Quantachrome*).

**Fig. S1** FT-IR spectra of ALP-5 and its corresponding monomer (TASBF).

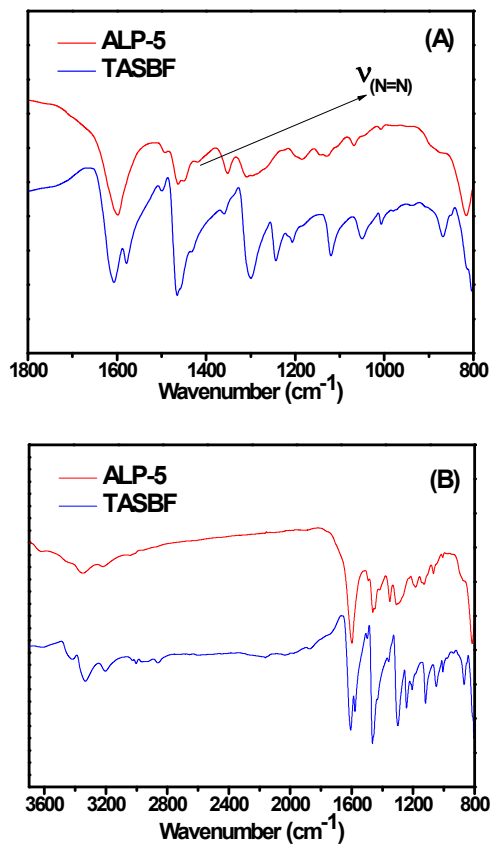

**Fig. S2** FT-IR spectra of ALP-6 and its corresponding monomer (TAPPA).

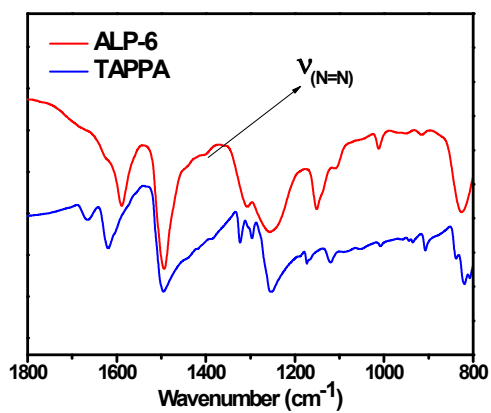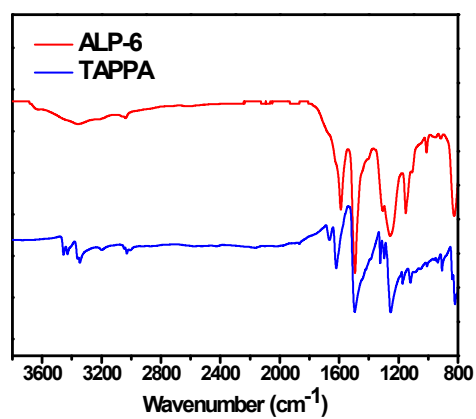

**Fig. S3** FT-IR spectra of ALP-7 and its corresponding monomer (TAPA).

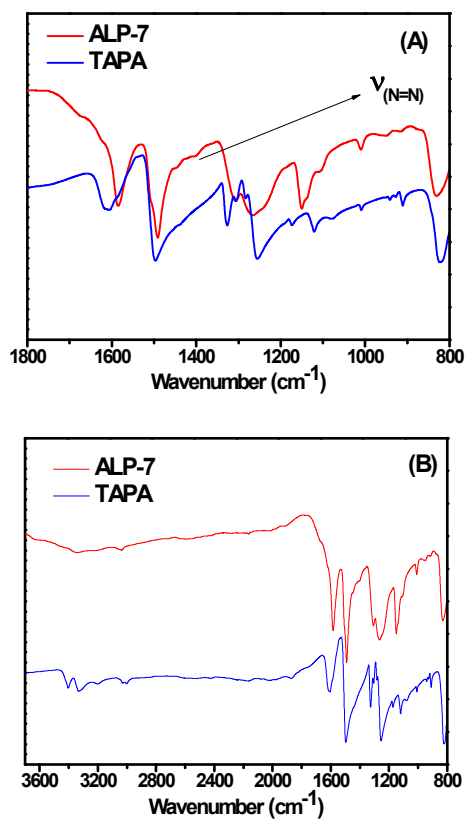

**Fig. S4** FT-IR spectra of ALP-8 and its corresponding monomer (TAPE).

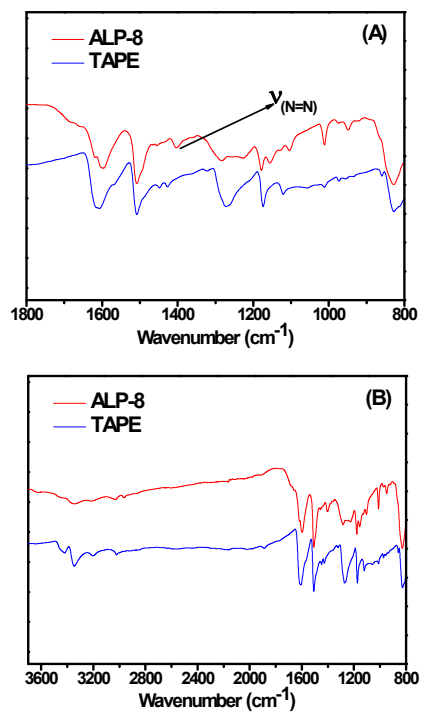

**Fig. S5** Solid state  $^{13}\text{C}$  CP-MAS NMR spectrum of ALP-5. Asterisks denote spinning side-bands.

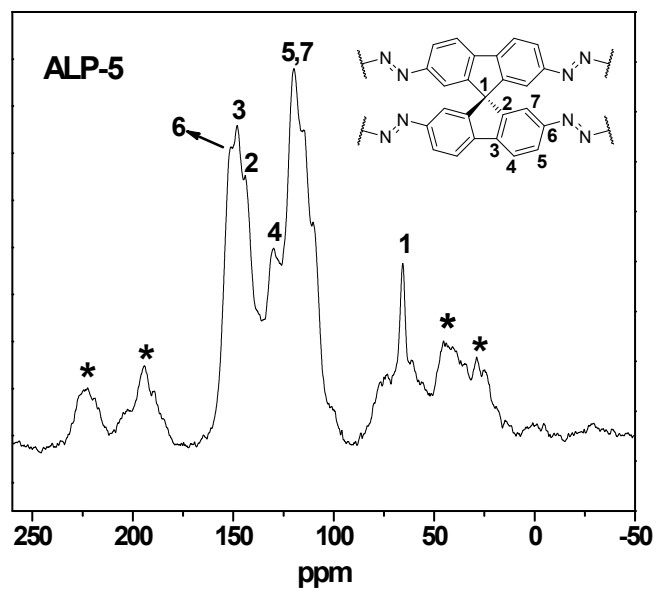



**Fig. S6** Solid state  $^{13}\text{C}$  CP-MAS NMR spectrum of ALP-6. Asterisks denote spinning side-bands.

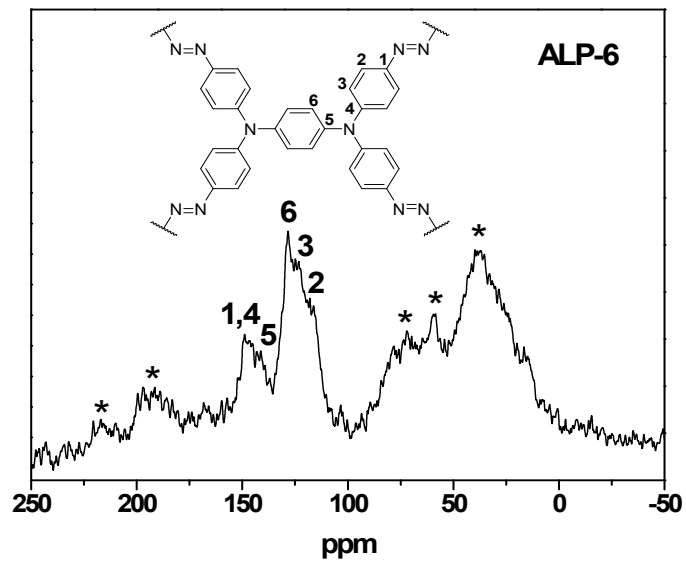

**Fig. S7** Solid state  $^{13}\text{C}$  CP-MAS NMR spectrum of ALP-7. Asterisks denote spinning side-bands.

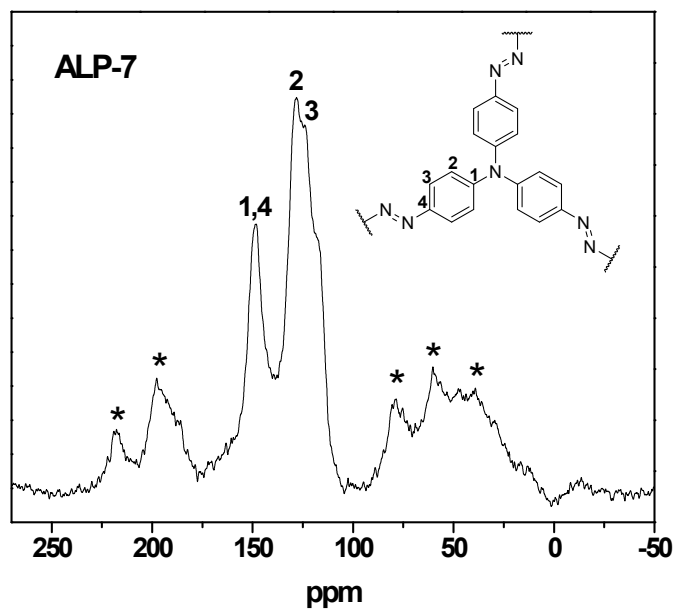

**Fig. S8** Solid state  $^{13}\text{C}$  CP-MAS NMR spectrum of ALP-8. Asterisks denote spinning side-bands.

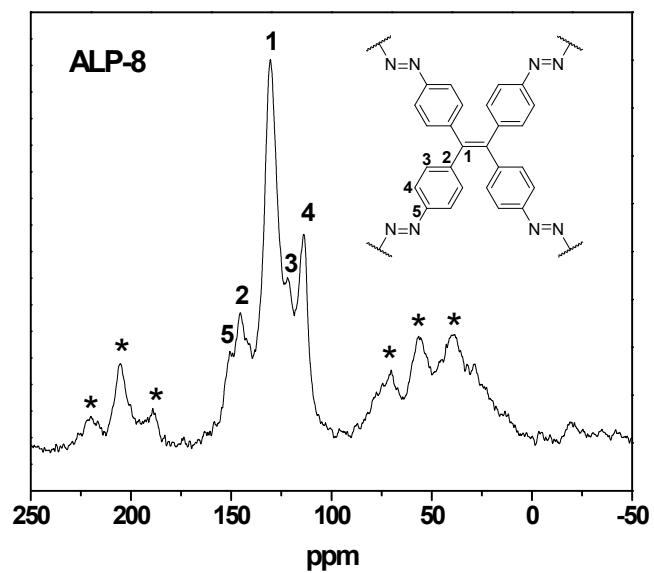

**Fig. S9** SEM image of ALP-5.

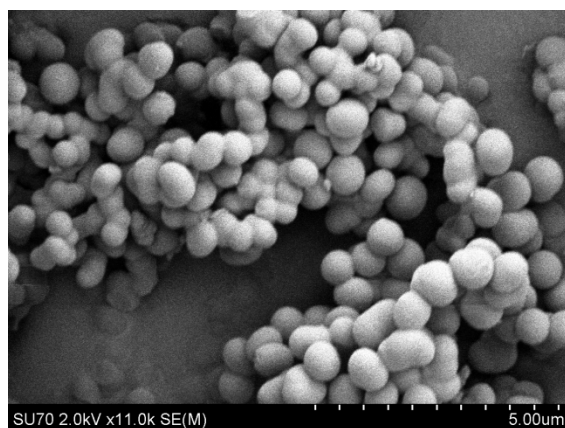

**Fig. S10** SEM image of ALP-6.

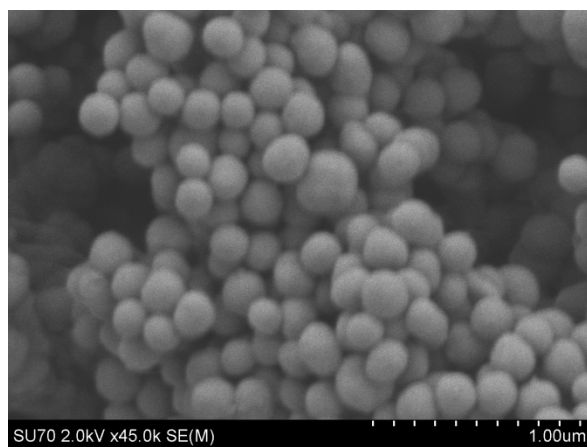

**Fig. S11** SEM image of ALP-7.

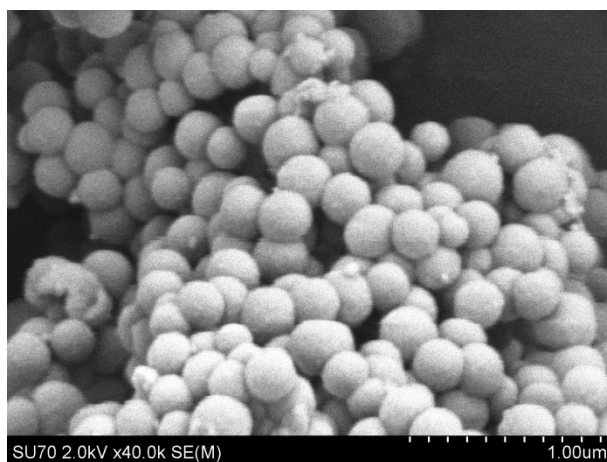

**Fig. S12** SEM image of ALP-8.

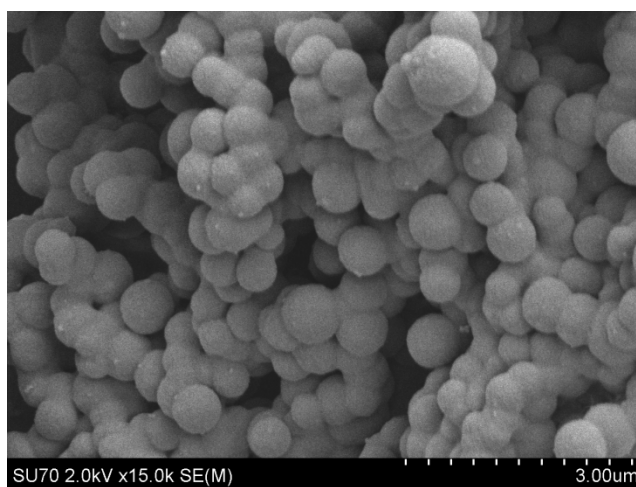

Fig. S13 PXRD pattern of ALPs.

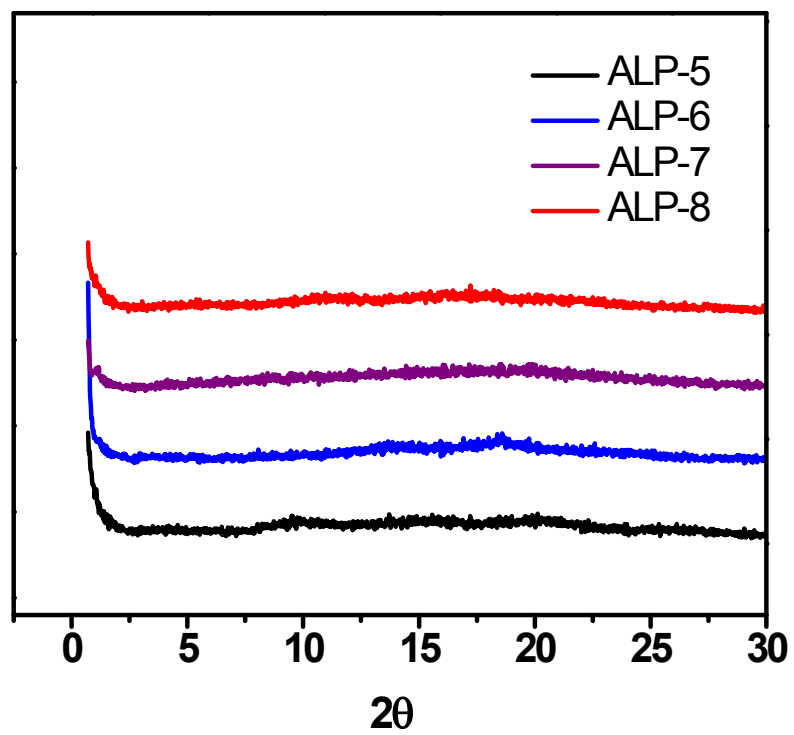

**Fig. S14** TGA traces of ALPs.

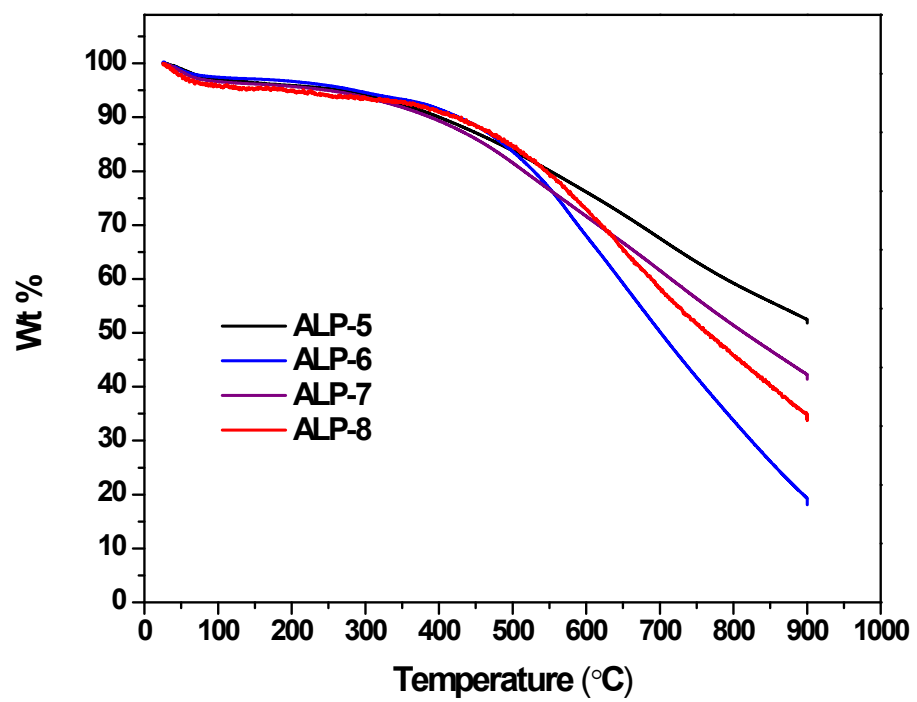

Fig. S15 BET plots for ALPs.

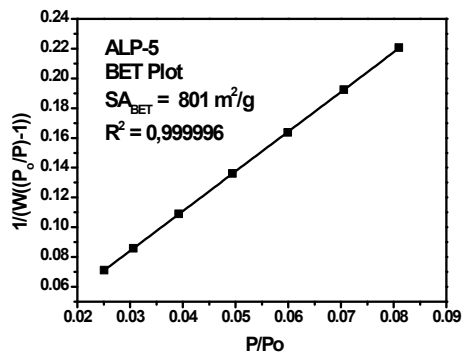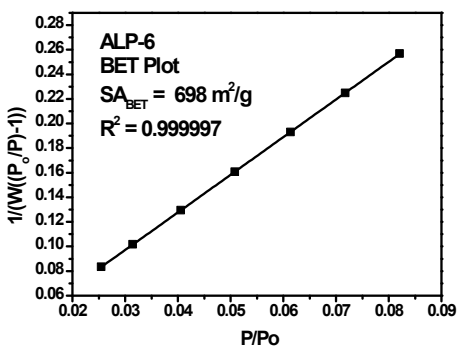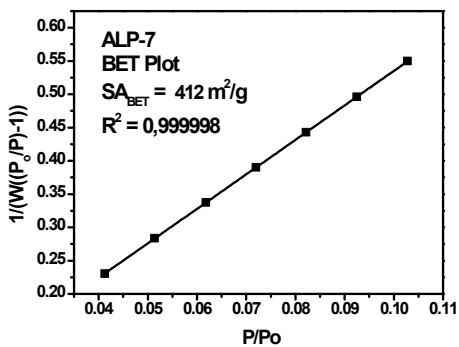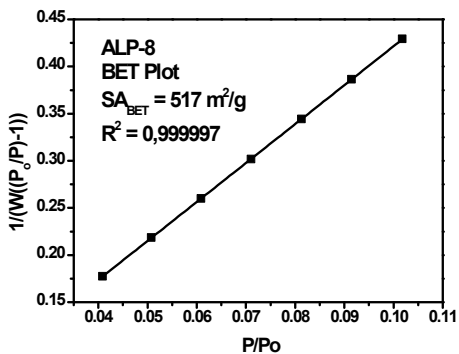



Fig. S16 Langmuir plots for ALPs.

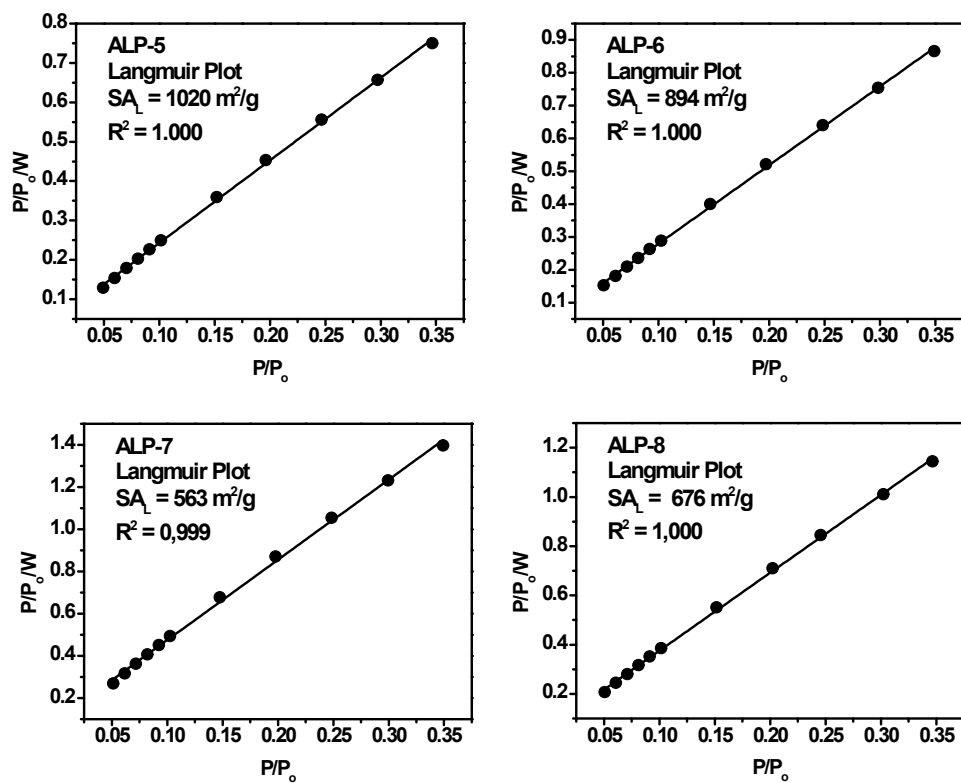

**Fig. S17** Pore size distribution of ALPs calculated from Ar adsorption branch using NLDFT (spherical/cylindrical model).

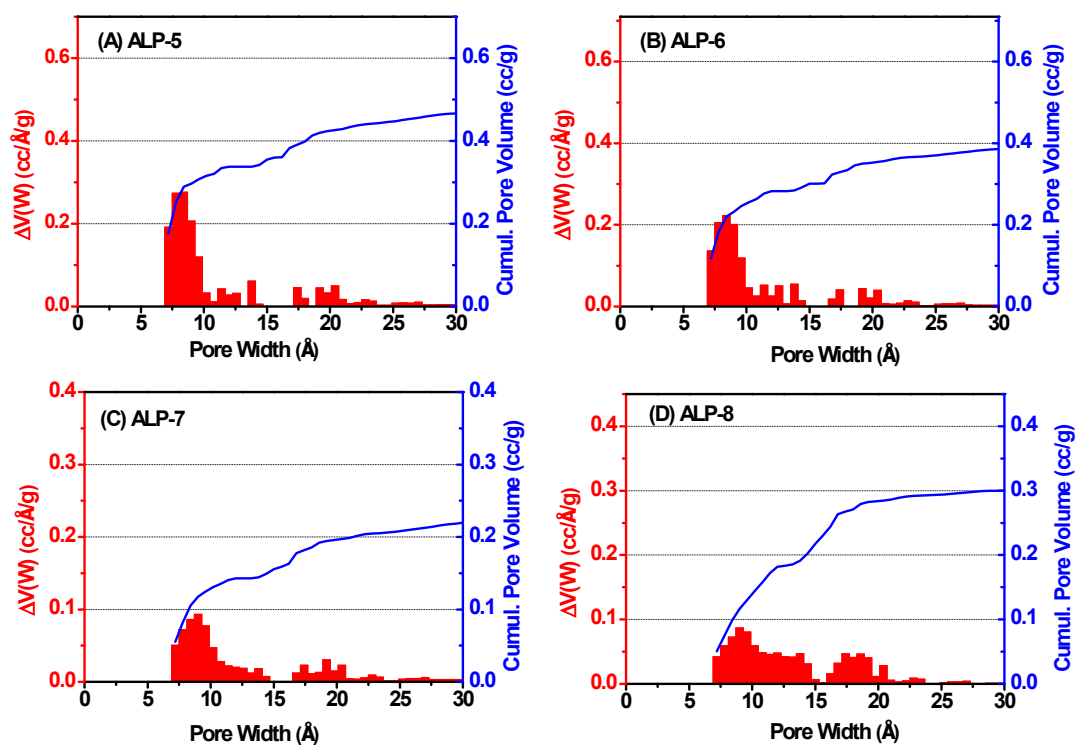

Fig. S18 CO<sub>2</sub>, CH<sub>4</sub>, and N<sub>2</sub> adsorption isotherms of ALPs at 298 K.

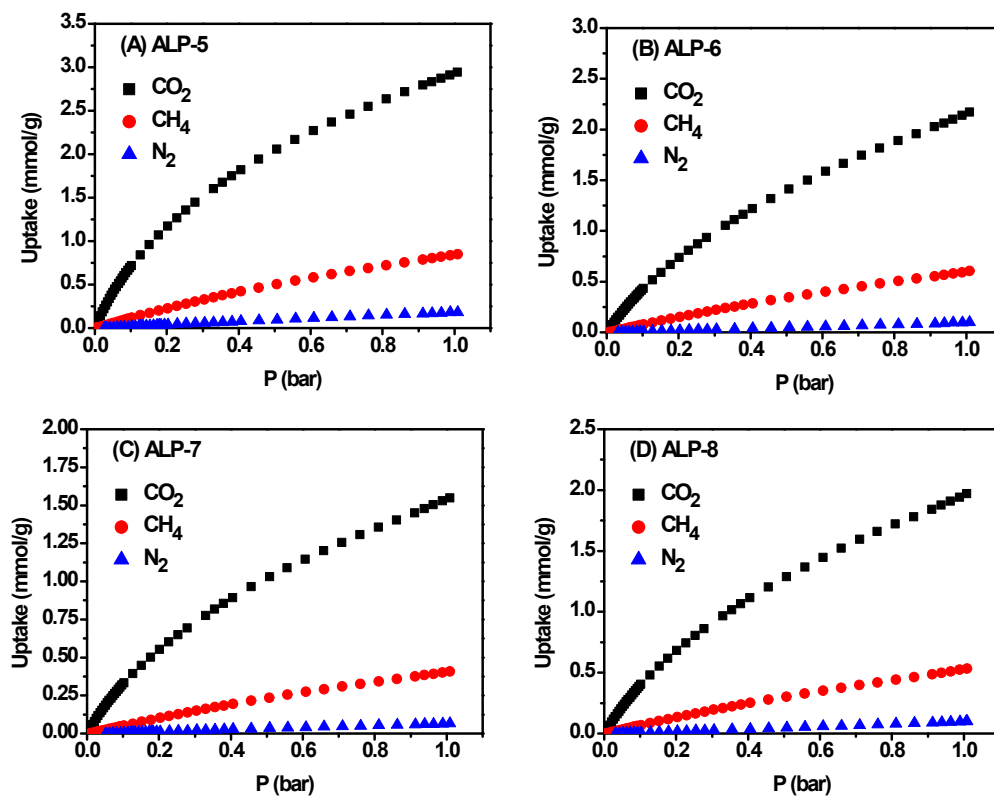

**Table S2.** Porosity parameters for ALPs.

| Polymer | SA <sub>BET</sub> <sup>a</sup> | Dominant pore size (nm) <sup>b</sup> | Total Pore Volume <sup>c</sup> | Ref.      |
|---------|--------------------------------|--------------------------------------|--------------------------------|-----------|
| ALP-1   | 1235                           | 1.0                                  | 0.66                           | 1         |
| ALP-2   | 1065                           | 1.1                                  | 0.57                           | 1         |
| ALP-3   | 975                            | 1.3                                  | 0.63                           | 1         |
| ALP-4   | 862                            | 1.1                                  | 0.50                           | 1         |
| ALP-5   | 801                            | 0.80                                 | 0.39                           | This Work |
| ALP-6   | 698                            | 0.85                                 | 0.36                           | This Work |
| ALP-7   | 412                            | 0.90                                 | 0.27                           | This Work |
| ALP-8   | 517                            | 0.92                                 | 0.25                           | This Work |

<sup>a</sup>Surface area (m<sup>2</sup> g<sup>-1</sup>) calculated from the Ar adsorption branch according to the BET model. <sup>b</sup>Pore size distributions (PSDs) were estimated from the adsorption branch of the Ar isotherms by NLDFT. <sup>c</sup>The total pore volume (cm<sup>3</sup> g<sup>-1</sup>) calculated from single point Ar uptake at P/P<sub>0</sub>= 0.90.

**Table S3.** CO<sub>2</sub>, CH<sub>4</sub>, and N<sub>2</sub> uptakes, and isosteric heats of adsorption ( $Q_{st}$ ) for ALPs.

| Polymer | CO <sub>2</sub> Uptake at 1 bar <sup>a</sup> |       |                       | CH <sub>4</sub> Uptake at 1 bar <sup>a</sup> |       |                       | N <sub>2</sub> Uptake at 1 bar <sup>a</sup> |       | Ref.      |
|---------|----------------------------------------------|-------|-----------------------|----------------------------------------------|-------|-----------------------|---------------------------------------------|-------|-----------|
|         | 273 K                                        | 298 K | $Q_{st}$ <sup>b</sup> | 273 K                                        | 298 K | $Q_{st}$ <sup>b</sup> | 273 K                                       | 298 K |           |
| ALP-1   | 5.4                                          | 3.3   | 29.2                  | 1.6                                          | 0.94  | 20.8                  | 0.41                                        | 0.21  | 1         |
| ALP-2   | 4.8                                          | 2.4   | 27.9                  | 1.1                                          | 0.67  | 18.5                  | 0.31                                        | 0.14  | 1         |
| ALP-3   | 3.8                                          | 2.3   | 29.6                  | 1.1                                          | 0.60  | 21.0                  | 0.25                                        | 0.12  | 1         |
| ALP-4   | 3.5                                          | 1.8   | 28.2                  | 0.89                                         | 0.52  | 21.2                  | 0.24                                        | 0.12  | 1         |
| ALP-5   | 4.5                                          | 2.9   | 32.5                  | 1.4                                          | 0.85  | 22.4                  | 0.40                                        | 0.18  | This Work |
| ALP-6   | 3.4                                          | 2.2   | 28.6                  | 1.0                                          | 0.60  | 19.0                  | 0.25                                        | 0.10  | This Work |
| ALP-7   | 2.5                                          | 1.5   | 30.7                  | 0.73                                         | 0.40  | 22.2                  | 0.19                                        | 0.06  | This Work |
| ALP-8   | 3.0                                          | 2.0   | 29.4                  | 0.90                                         | 0.53  | 20.0                  | 0.21                                        | 0.10  | This Work |

<sup>a</sup>Uptake in mmol g<sup>-1</sup>. <sup>b</sup>Isosteric enthalpies of adsorption ( $Q_{st}$ ) in kJ mol<sup>-1</sup> at zero coverage.

**Table S4.** Surface area, CO<sub>2</sub> uptake, and isosteric heat of adsorption of porous azo-linked polymers.

| Polymer   | Surface area <sup>a</sup> | CO <sub>2</sub> uptake at 1 bar <sup>b</sup> |       | $Q_{st}$ for CO <sub>2</sub> <sup>c</sup> | Reference |
|-----------|---------------------------|----------------------------------------------|-------|-------------------------------------------|-----------|
|           |                           | 273 K                                        | 298 K |                                           |           |
| ALP-1     | 1235                      | 5.4                                          | 3.3   | 29.2                                      | 1         |
| ALP-2     | 1065                      | 4.8                                          | 2.4   | 27.9                                      | 1         |
| ALP-3     | 975                       | 3.8                                          | 2.3   | 29.6                                      | 1         |
| ALP-4     | 862                       | 3.5                                          | 1.8   | 28.2                                      | 1         |
| ALP-5     | 801                       | 4.5                                          | 2.9   | 32.5                                      | This Work |
| ALP-6     | 698                       | 3.4                                          | 2.2   | 28.6                                      | This Work |
| ALP-7     | 412                       | 2.5                                          | 1.5   | 30.7                                      | This Work |
| ALP-8     | 517                       | 3.0                                          | 2.0   | 29.4                                      | This Work |
| azo-COP-1 | 635                       | 2.4                                          | 1.5   | 29.3                                      | 2         |
| azo-COP-2 | 729                       | 2.6                                          | 1.5   | 24.8                                      | 2         |
| azo-COP-3 | 493                       | 1.9                                          | 1.2   | 32.1                                      | 2         |
| azo-POF-1 | 712                       | 3.0                                          | 1.9   | 27.5                                      | 3         |
| azo-POF-2 | 439                       | 1.9                                          | 1.3   | 26.6                                      | 3         |

<sup>a</sup>Surface area (m<sup>2</sup> g<sup>-1</sup>) calculated based on the BET model. <sup>b</sup>CO<sub>2</sub> uptake in mmol g<sup>-1</sup>. <sup>c</sup>Isosteric heat of adsorption ( $Q_{st}$ ) at zero coverage in kJ mol<sup>-1</sup>.

Fig. S19 Virial fitting for CO<sub>2</sub> isotherms of ALPs.

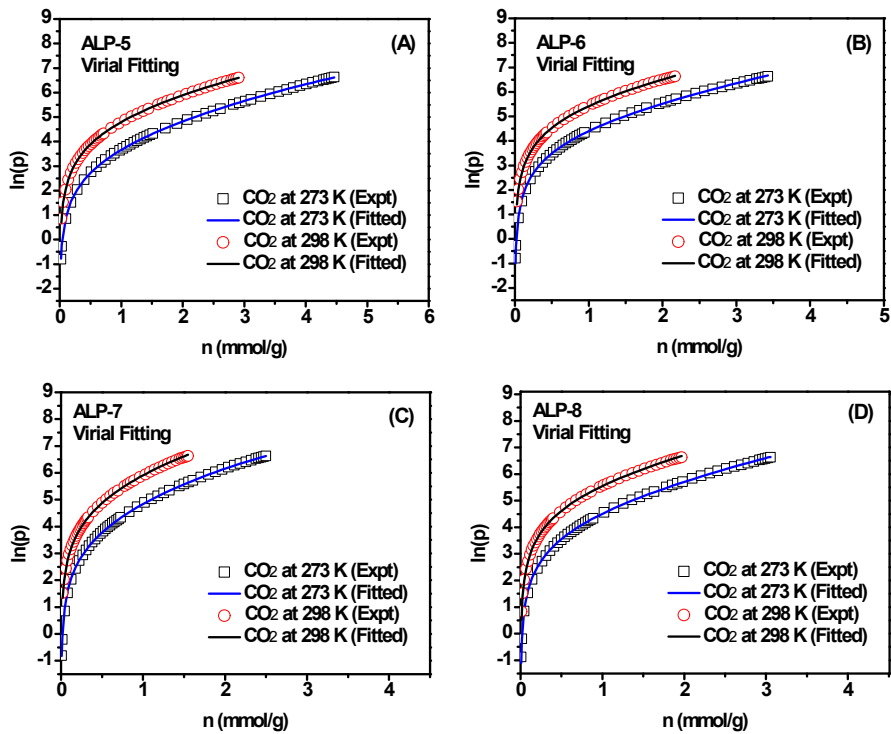

Fig. S20 Virial fitting for CH<sub>4</sub> isotherms of ALPs.

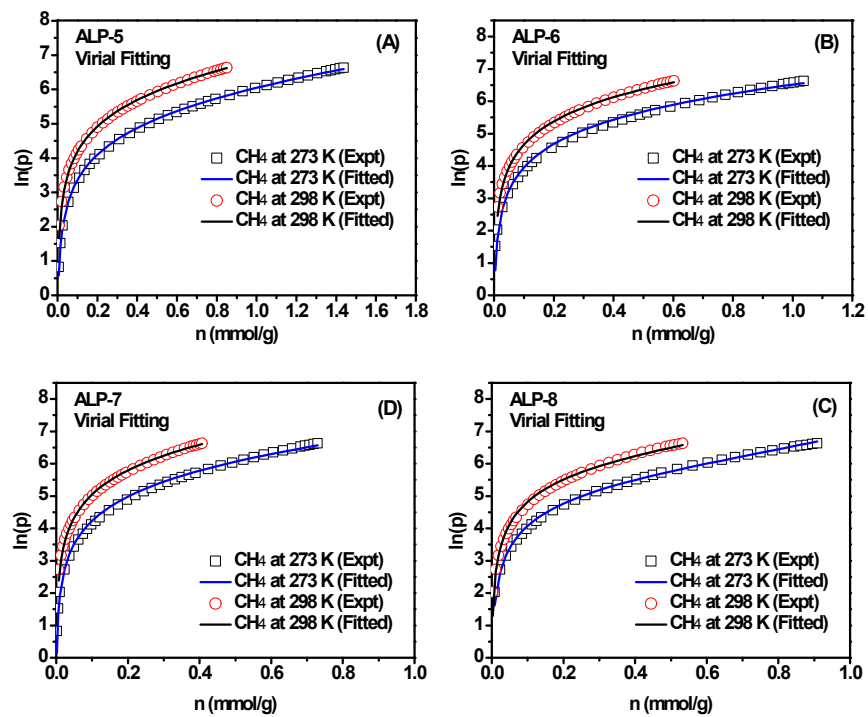



**Fig. S21** Experimental data and corresponding fittings of gas isotherms for ALP-5. (Dual site Langmuir-Freundlich for CO<sub>2</sub>, and single site Langmuir-Freundlich for CH<sub>4</sub> and N<sub>2</sub> with temperature dependent parameter at 273 and 298 K).

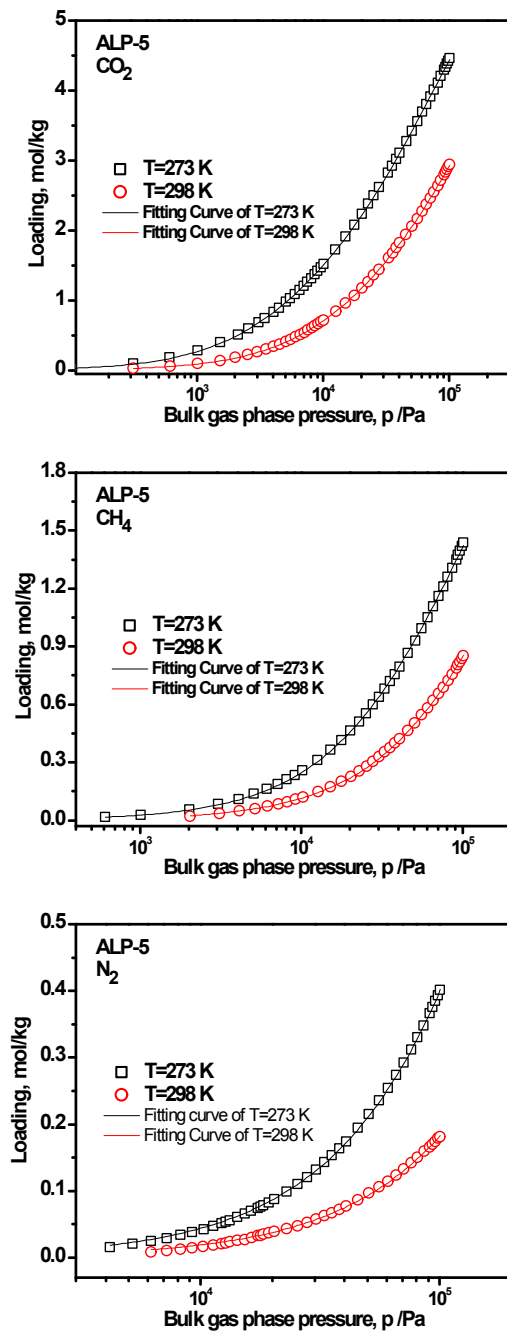



**Fig. S22** Experimental data and corresponding fittings of gas isotherms for ALP-6. (Dual site Langmuir-Freundlich for CO<sub>2</sub>, and single site Langmuir-Freundlich for CH<sub>4</sub> and N<sub>2</sub> with temperature dependent parameter at 273 and 298 K).

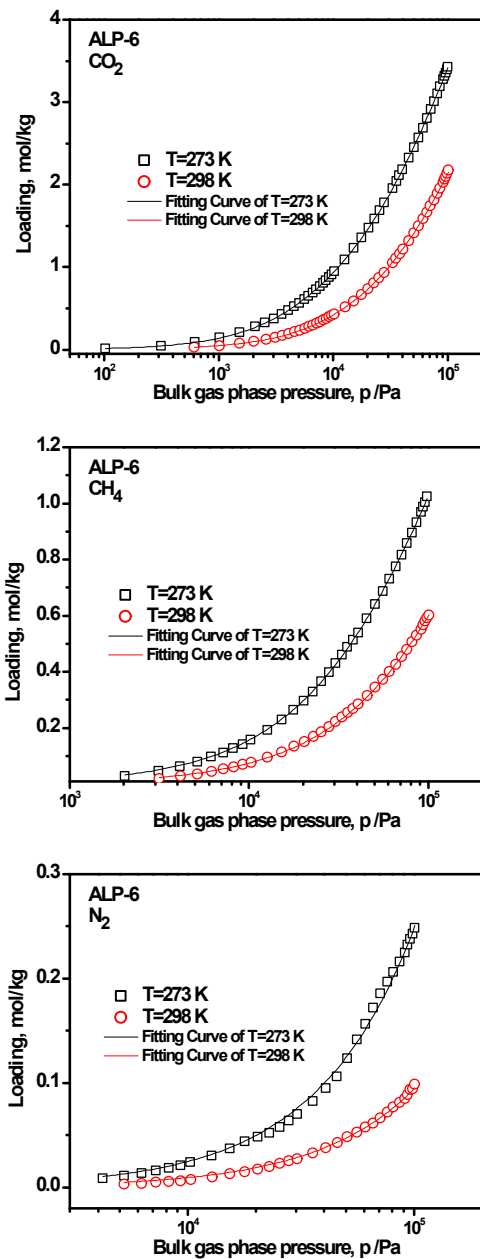

**Fig. S23** Experimental data and corresponding fittings of gas isotherms for ALP-7. (Dual site Langmuir-Freundlich for CO<sub>2</sub>, and single site Langmuir-Freundlich for CH<sub>4</sub> and N<sub>2</sub> with temperature dependent parameter at 273 and 298 K).

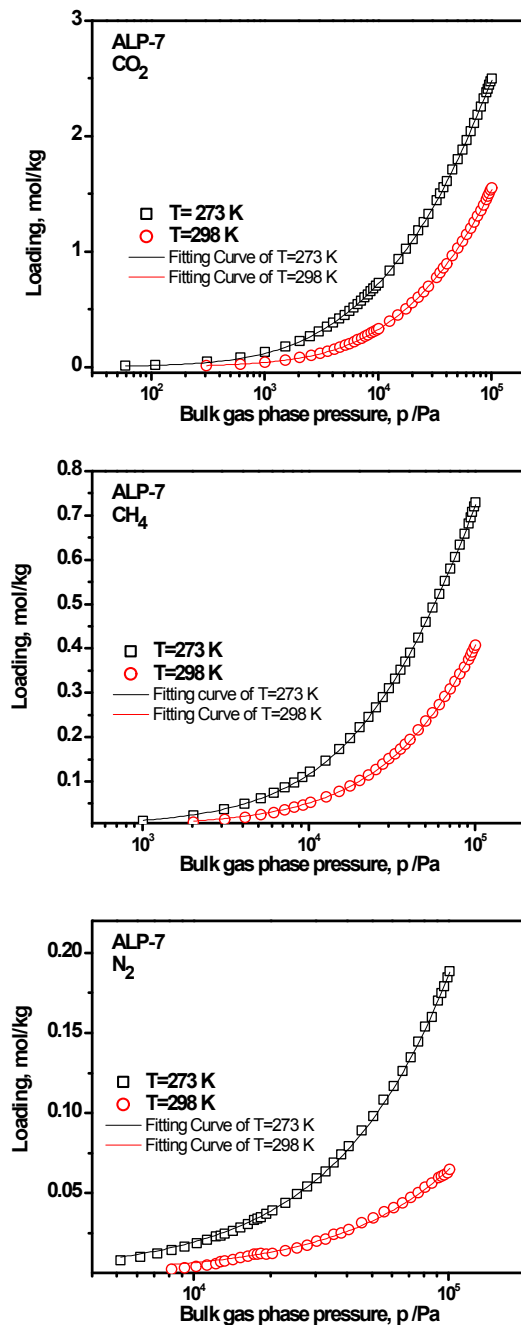

**Fig. S24** Experimental data and corresponding fittings of gas isotherms for ALP-8. (Dual site Langmuir-Freundlich for CO<sub>2</sub>, and single site Langmuir-Freundlich for CH<sub>4</sub> and N<sub>2</sub> with temperature dependent parameter at 273 and 298 K).

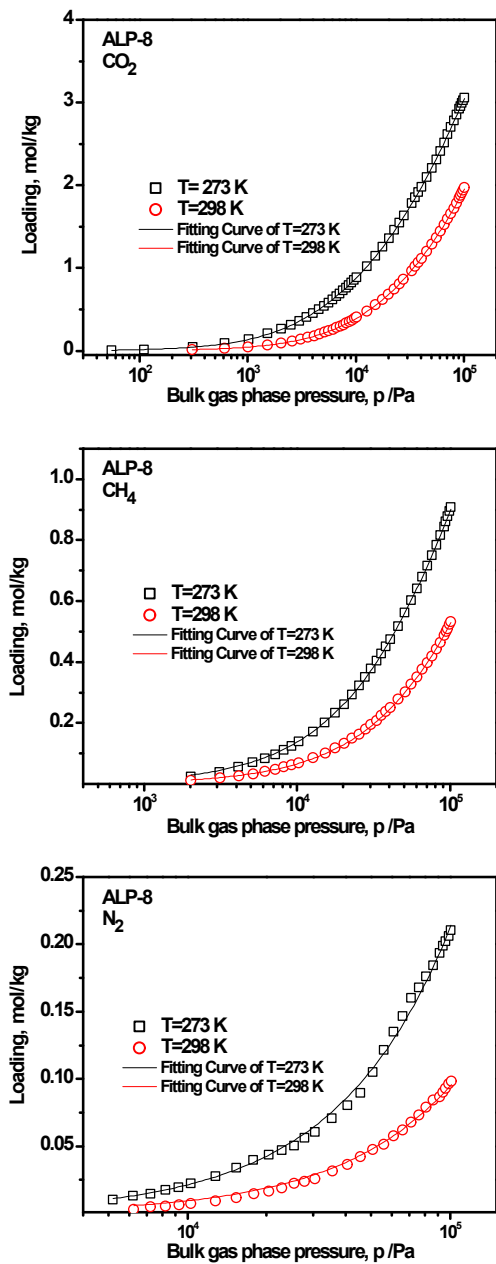

**Fig. S25** High-pressure total (absolute) CO<sub>2</sub> uptake of ALP-1 and ALP-5 at 298 K.

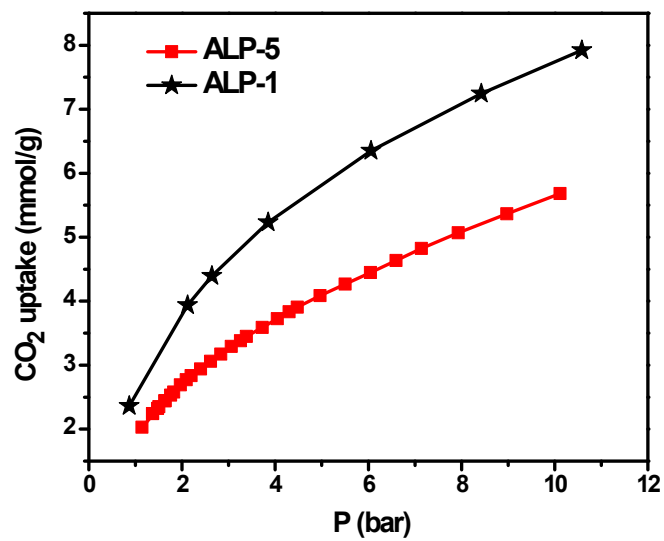

**Fig. S26** High pressure total (absolute) CH<sub>4</sub> uptake of ALP-1 and ALP-5 at 298 K.

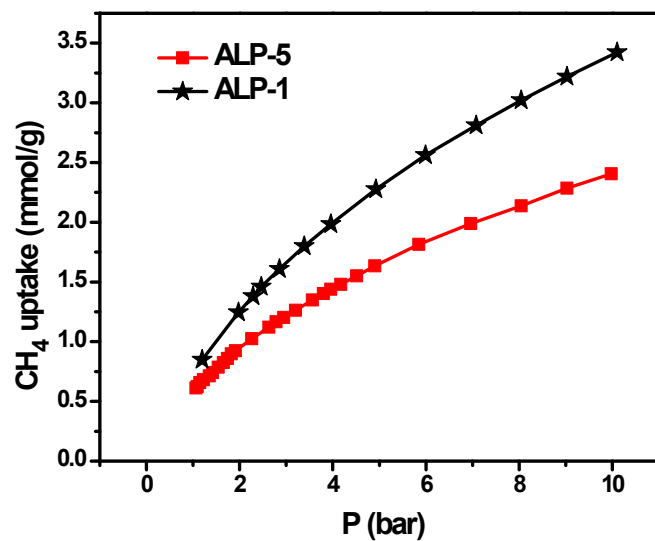

**Table S5.** IAST selectivity of different classes of azo-linked porous polymers.

| Polymer                | CO <sub>2</sub> /N <sub>2</sub> selectivity<br>at 1 bar |       | Reference |
|------------------------|---------------------------------------------------------|-------|-----------|
|                        | 273 K                                                   | 298 K |           |
| ALP-1 <sup>a</sup>     | 40                                                      | 28    | 1         |
| ALP-2 <sup>a</sup>     | 34                                                      | 26    | 1         |
| ALP-3 <sup>a</sup>     | 44                                                      | 35    | 1         |
| ALP-4 <sup>a</sup>     | 35                                                      | 26    | 1         |
| ALP-5 <sup>b</sup>     | 60                                                      | 47    | This Work |
| ALP-6 <sup>b</sup>     | 45                                                      | 48    | This Work |
| ALP-7 <sup>b</sup>     | 52                                                      | 56    | This Work |
| ALP-8 <sup>b</sup>     | 51                                                      | 44    | This Work |
| azo-COP-1 <sup>a</sup> | 64                                                      | 97    | 2         |
| azo-COP-2 <sup>a</sup> | 110                                                     | 131   | 2         |
| azo-COP-3 <sup>a</sup> | 79                                                      | 96    | 2         |
| azo-POF-1 <sup>a</sup> | 52                                                      | 37    | 3         |
| azo-POF-2 <sup>a</sup> | 55                                                      | 42    | 3         |

<sup>a</sup>For CO<sub>2</sub>:N<sub>2</sub> mole ratio of 15:85. <sup>b</sup>For CO<sub>2</sub>:N<sub>2</sub> mole ratio of 10:90.



Fig. S27 Gas uptakes and initial slope selectivity studies of ALP-5.

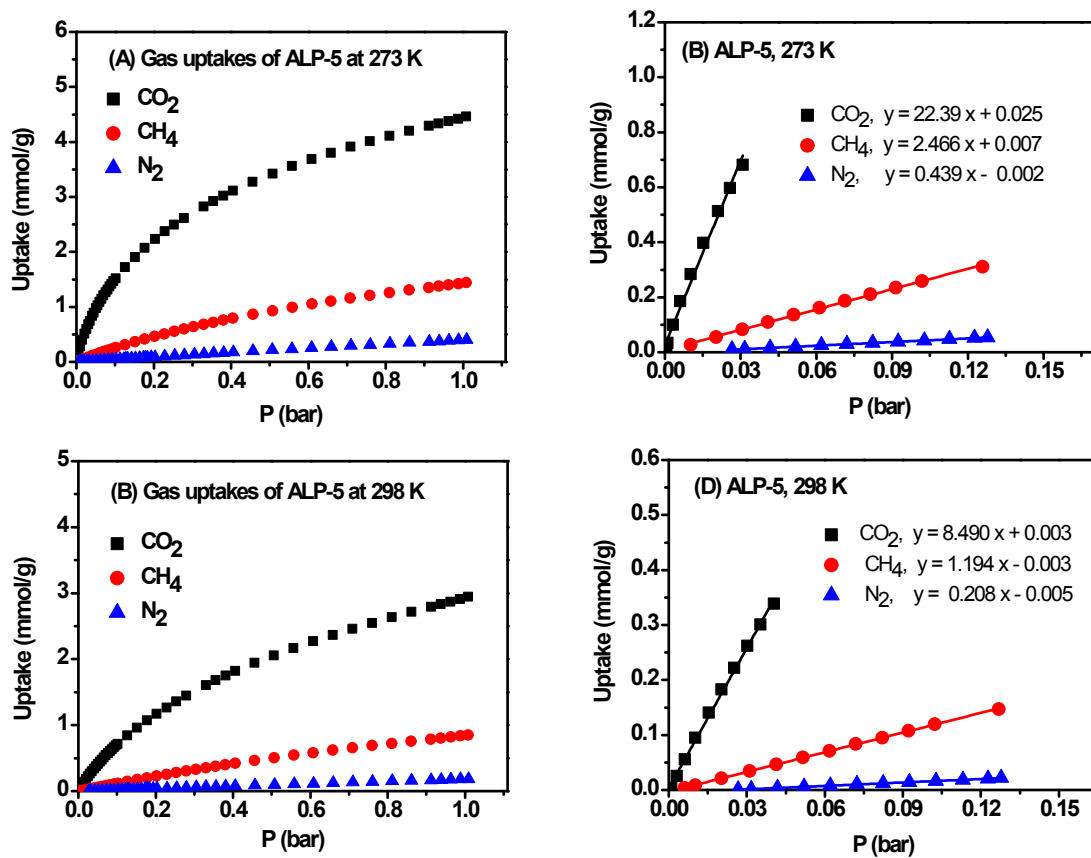

Fig. S28 Gas uptakes and initial slope selectivity studies of ALP-6.

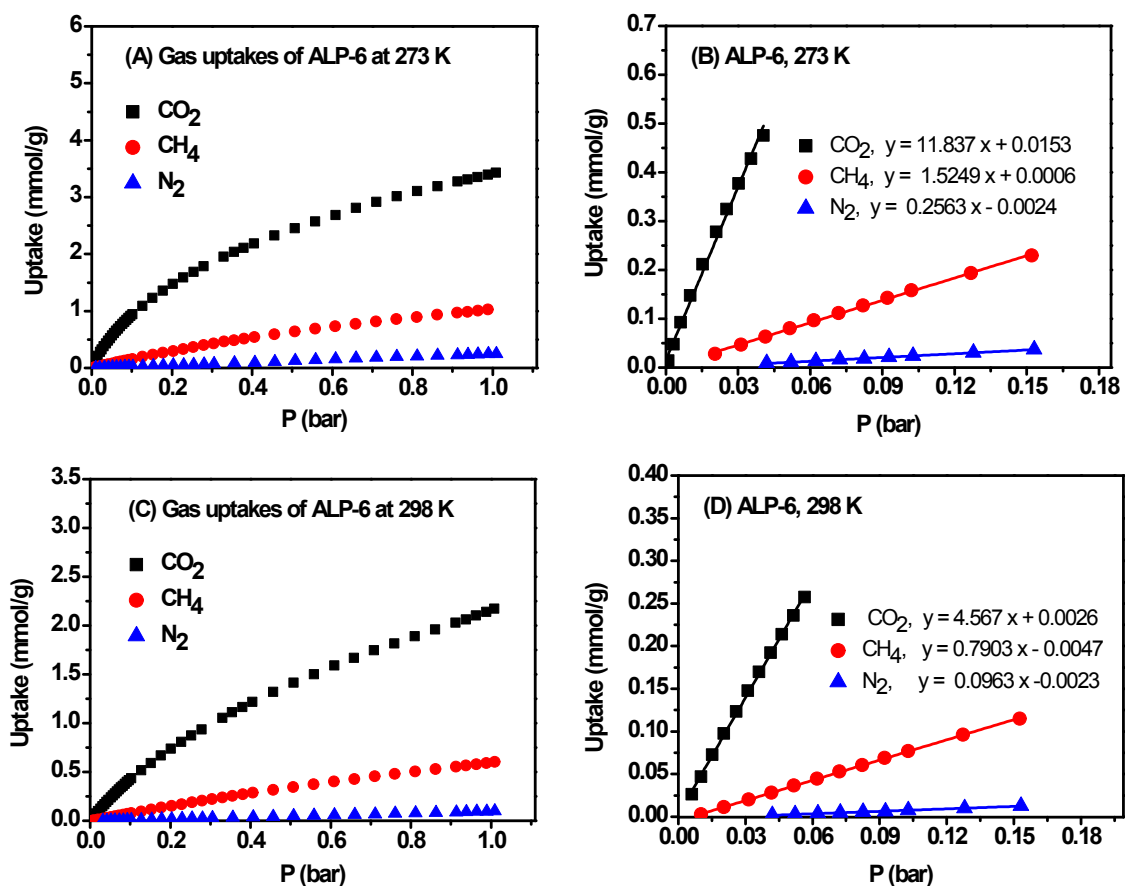

Fig. S29 Gas uptakes and initial slope selectivity studies of ALP-7.

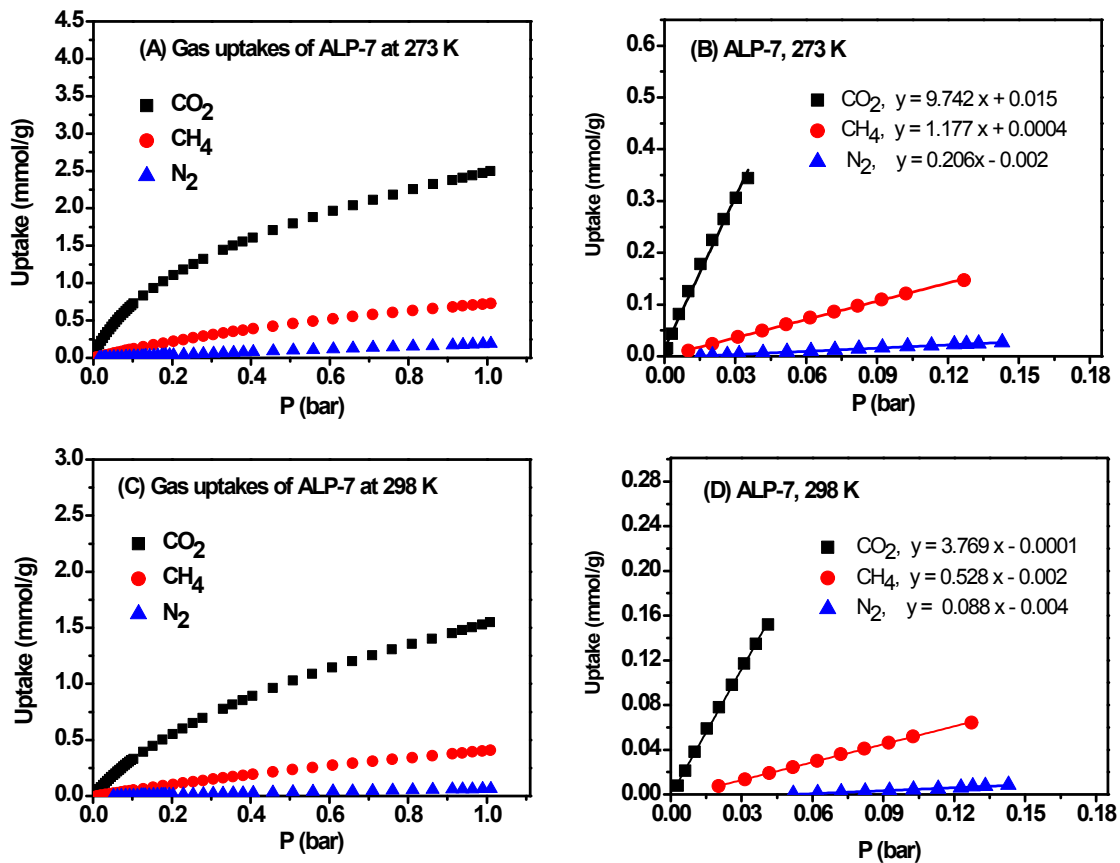

Fig. S30 Gas uptakes and initial slope selectivity studies of ALP-8.

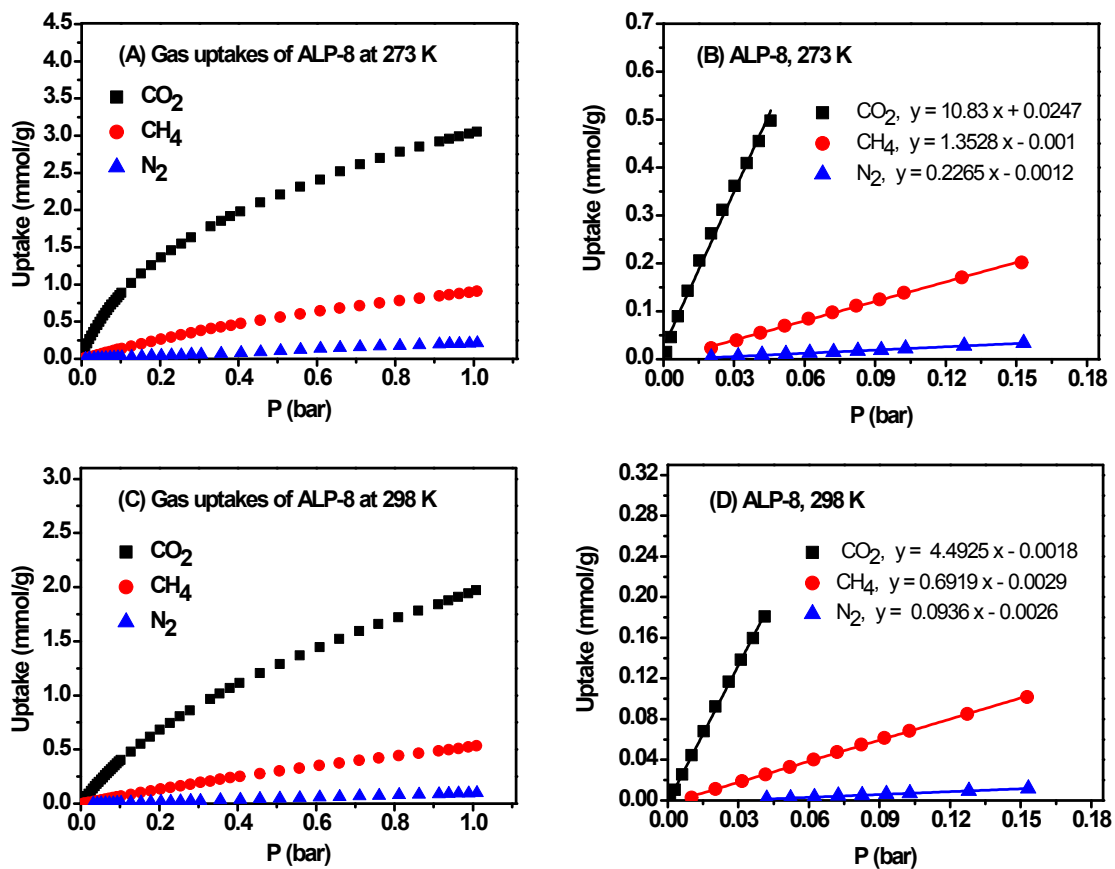

**Table S6.** Initial slope selectivity of ALPs.

| Polymer | CO <sub>2</sub> /N <sub>2</sub> Selectivity <sup>a</sup> |       | CO <sub>2</sub> /CH <sub>4</sub> Selectivity <sup>a</sup> |       | Reference |
|---------|----------------------------------------------------------|-------|-----------------------------------------------------------|-------|-----------|
|         | 273 K                                                    | 298 K | 273 K                                                     | 298 K |           |
| ALP-1   | 35                                                       | 27    | 6                                                         | 5     | 1         |
| ALP-5   | 51                                                       | 41    | 9                                                         | 7     | This Work |
| ALP-6   | 46                                                       | 47    | 8                                                         | 6     | This Work |
| ALP-7   | 47                                                       | 43    | 8                                                         | 7     | This Work |
| ALP-8   | 48                                                       | 48    | 8                                                         | 6     | This Work |

<sup>a</sup>(mol mol<sup>-1</sup>).

## References

1. P. Arab, M. G. Rabbani, A. K. Sekizkardes, T. İslamoğlu and H. M. El-Kaderi, *Chem. Mater.*, 2014, **26**, 1385-1392.
2. H. A. Patel, S. H. Je, J. Park, D. P. Chen, Y. Jung, C. T. Yavuz and A. Coskun, *Nat. Commun.*, 2013, **4**, 1357.
3. J. Lu and J. Zhang, *J. Mater. Chem. A.*, 2014, **2**, 13831-13834.
